# Supplementary material
Source: PubMed Central journal article supplement (PMC4645624)
Supplement: supp_M115.671065_jbc.M115.671065-1.pdf [file supp_M115.671065_jbc.M115.671065-1.pdf]

## SUPPLEMENTAL FIGURES

**Phagosomal Acidification Prevents Macrophage Inflammatory Cytokine Production to Malaria and DCs are the Major Source at the Early Stages of Infection:** IMPLICATION FOR MALARIA PROTECTIVE IMMUNITY DEVELOPMENT

**Xianzhu Wu, Nagaraj M. Gowda<sup>1</sup>, and D. Channe Gowda<sup>2</sup>**

*From the Department of Biochemistry and Molecular Biology, Pennsylvania State University College of Medicine, Hershey, PA17033*

**\*Running Title:** Macrophage phagosome acidification to malaria

**Keywords:** Malaria parasites; Inflammatory cytokines; Macrophages; Phagosomal acidification; Dendritic cells

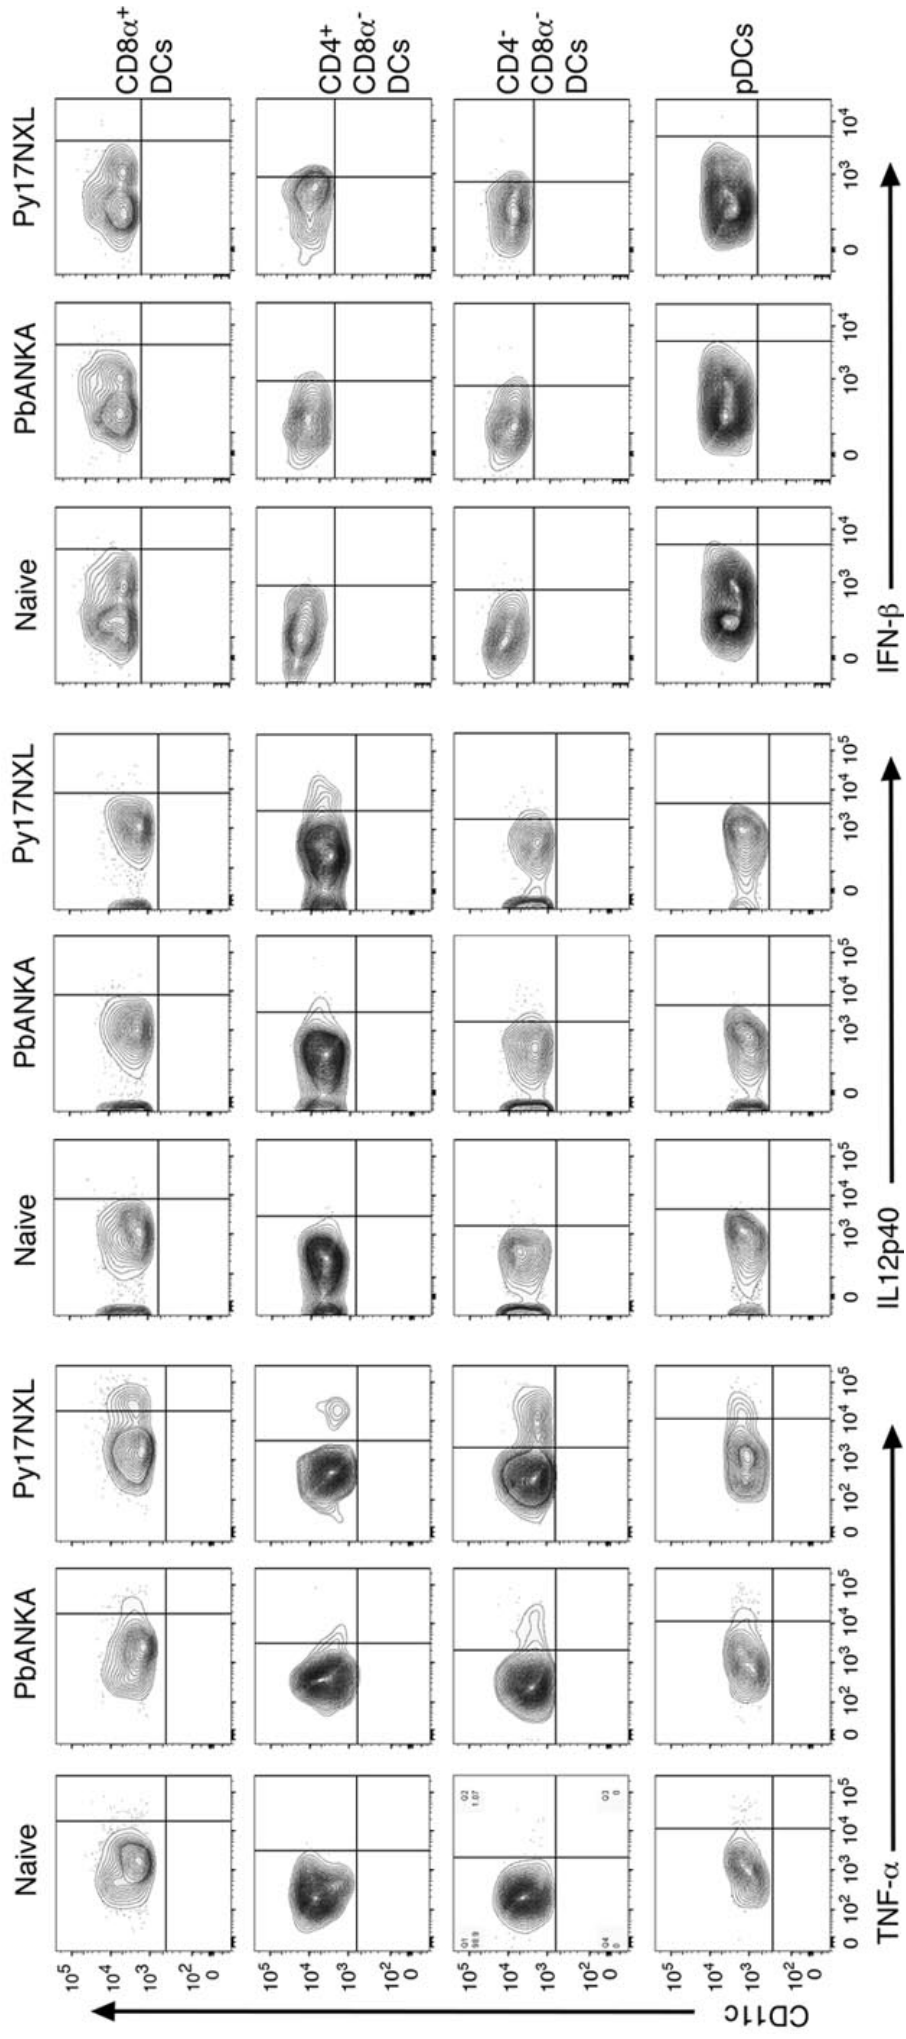

**FIGURE S1. The spleen DC subsets in malaria parasite-infected mice differentially produce inflammatory cytokines.** Spleen cells from mice ( $n = 3$ ) at 3 days postinfection with either Py17NXL or PbANKA were cultured and treated with the Golgi-Plug. The cells were then surface stained with antibodies against the indicated marker proteins followed by intracellular staining with anti-cytokine antibodies and analyzed by flow cytometry. The spleen DC subsets, gated as shown in Fig. 2, were analyzed for the expression of TNF- $\alpha$ , IL-12 and IFN- $\beta$ . pDC, plasmacytoid DCs. Shown are the contour plots of cytokine expression by DC subsets by in a representative of four independent experiments.

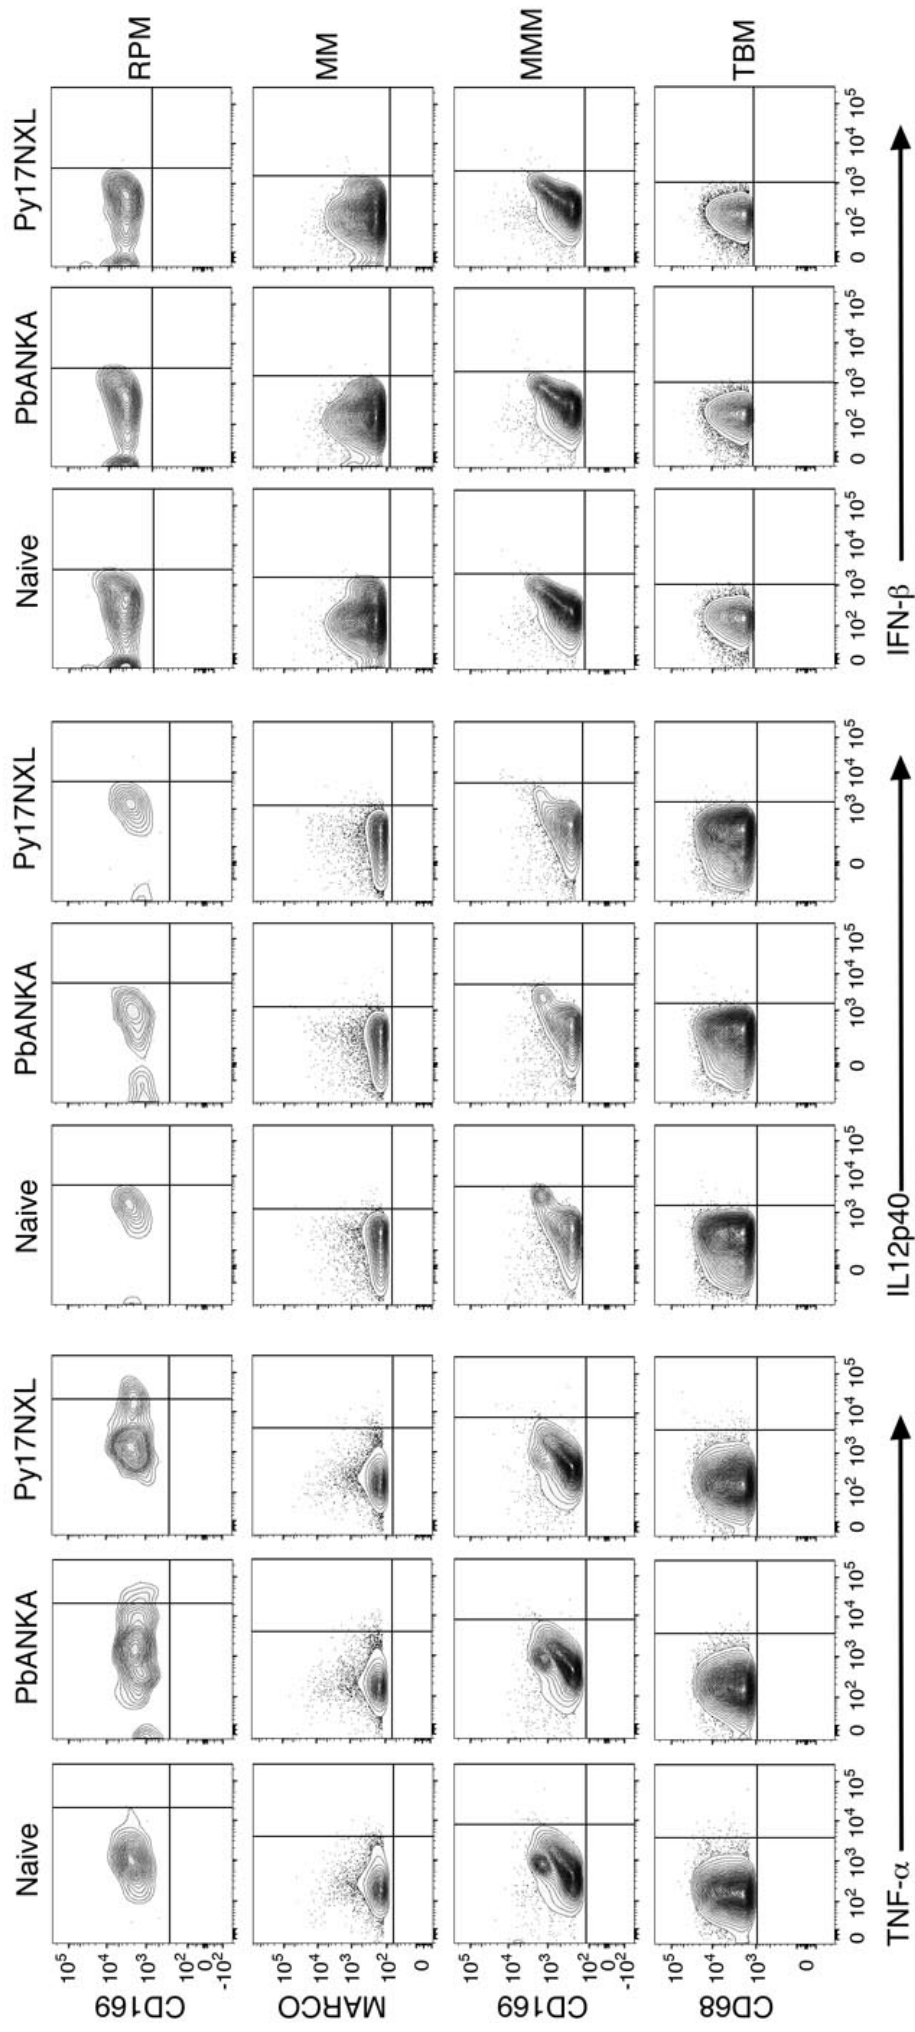

**FIGURE S2. The majority of spleen macrophages in malaria parasite-infected mice do not produce inflammatory cytokines.** Spleen cells from mice ( $n = 3$ ) at 3 days postinfection with either Py17NXL or PbANKA were cultured and treated with the Golgi-Plug. The cells were then surface stained with antibodies against the indicated marker proteins followed by intracellular staining with anti-cytokine antibodies and analyzed by flow cytometry. The spleen macrophage subsets, gated as shown in Fig. 3, were analyzed for the indicated cytokine expression. Shown are the contour plots of cytokine expression by macrophage subsets. MM, marginal zone macrophages; MMM, marginal zone metallophilic macrophages; TBM, tangible body macrophage; RPM; red pulp macrophages. Shown are the contour plots of cytokine expression by macrophage subsets in a representative of four independent experiments.
